# Supplementary material
Source: Elsevier journal article supplement (https://comptes-rendus.academie-sciences.fr/biologies/article/10.1016/j.crvi.2016.09.005/file/attach/mmc3.pdf)
Supplement: mmc3 [file mmc3.pdf]

Appendix C. DNASP analyses of cytochrome b sequences

| Species                        | Populations          | sequences<br>n | segregating<br>sites<br>S | haplotypes<br>h | Haplotype<br>diversity<br>Hd | Nucleotide<br>diversity<br>Pi | K2P<br>distances |      |       | Average<br>number of<br>differences<br>K |
|--------------------------------|----------------------|----------------|---------------------------|-----------------|------------------------------|-------------------------------|------------------|------|-------|------------------------------------------|
|                                |                      |                |                           |                 |                              |                               | Min              | Mean | Max   |                                          |
| <i>Eidolon helvum</i>          | West Africa          | 11             | 120                       | 10              | 0.98182                      | 0.00766                       | 0                | 0.77 | 1.24  | 8.73                                     |
|                                | Central + SE Africa  | 77             | 35                        | 66              | 0.99487                      | 0.00784                       | 0                | 0.79 | 2.15  | 8.94                                     |
|                                | TOTAL                | 88             | 128                       | 75              | 0.99556                      | 0.0078                        | 0                | 0.79 | 2.15  | 8.89                                     |
| <i>Epomophorus gambianus</i>   | West Africa          | 11             | 13                        | 7               | 0.90909                      | 0.00338                       | 0                | 0.34 | 0.53  | 3.85                                     |
|                                | Central Africa       | 24             | 48                        | 14              | 0.93841                      | 0.0098                        | 0                | 0.99 | 1.96  | 11.18                                    |
|                                | TOTAL                | 35             | 55                        | 21              | 0.96303                      | 0.00944                       | 0                | 0.95 | 1.96  | 10.76                                    |
| <i>Epomops buettikoferi</i>    | West Africa          | 59             | 47                        | 35              | 0.92285                      | 0.00268                       | 0                | 0.27 | 0.97  | 3.06                                     |
| <i>Epomops franqueti</i>       | West Africa          | 8              | 11                        | 8               | 1                            | 0.00273                       | 0.09             | 0.27 | 0.44x | 3.11                                     |
|                                | Central Africa       | 140            | 119                       | 83              | 0.98726                      | 0.00652                       | 0                | 0.66 | 1.69  | 7.43                                     |
|                                | TOTAL                | 148            | 141                       | 91              | 0.9886                       | 0.00876                       | 0                | 0.89 | 3.44  | 9.99                                     |
| <i>Hypsognathus monstrosus</i> | West Africa          | 14             | 33                        | 11              | 0.96703                      | 0.00583                       | 0                | 0.59 | 1.06  | 6.65                                     |
|                                | Central Africa       | 62             | 87                        | 45              | 0.97462                      | 0.00443                       | 0                | 0.45 | 1.42  | 5.05                                     |
|                                | TOTAL                | 76             | 102                       | 55              | 0.9814                       | 0.00474                       | 0                | 0.48 | 1.42  | 5.40                                     |
| <i>Micropteropus pusillus</i>  | West Africa          | 4              | 9                         | 4               | 1                            | 0.00453                       | 0.09             | 0.46 | 0.71  | 5.17                                     |
|                                | Central Africa       | 173            | 183                       | 91              | 0.97869                      | 0.01722                       | 0                | 1.78 | 6.04  | 19.63                                    |
|                                | TOTAL                | 177            | 185                       | 94              | 0.97958                      | 0.01706                       | 0                | 1.76 | 6.04  | 19.44                                    |
| <i>Nanonycteris veldkampii</i> | West Africa          | 25             | 45                        | 17              | 0.92333                      | 0.00449                       | 0                | 0.45 | 1.69  | 5.12                                     |
|                                | Central Africa       | 2              | 0                         | 1               | 0                            | 0.0000                        | 0                | 0.00 | 0.00  | 0.00                                     |
|                                | TOTAL                | 27             | 45                        | 17              | 0.89174                      | 0.00417                       | 0                | 0.42 | 1.69  | 4.75                                     |
| <i>Rousettus aegyptiacus</i>   | West Africa          | 26             | 63                        | 25              | 0.99692                      | 0.00777                       | 0                | 0.78 | 1.88  | 8.86                                     |
|                                | Central Africa       | 15             | 60                        | 15              | 1                            | 0.00971                       | 0.26             | 0.98 | 1.78  | 11.07                                    |
|                                | Southeastern Africa  | 5              | 39                        | 5               | 1                            | 0.01789                       | 0.35             | 1.83 | 2.80  | 20.40                                    |
|                                | Mediterranean Region | 5              | 4                         | 4               | 0.9                          | 0.00158                       | 0                | 0.16 | 0.26  | 1.80                                     |
|                                | TOTAL                | 51             | 126                       | 48              | 0.99765                      | 0.01194                       | 0                | 1.21 | 3.17  | 13.62                                    |

Gene flow estimates

| Species                        | Population 1           | Population 2         | Fst     | GammaSt |
|--------------------------------|------------------------|----------------------|---------|---------|
| <i>Eidolon helvum</i>          | Central Africa         | West Africa          | 0       | 0.0095  |
| <i>Hypsognathus monstrosus</i> | Central Africa         | West Africa          | 0.03017 | 0.02594 |
| <i>Rousettus aegyptiacus</i>   | Central Africa         | West Africa          | 0       | 0.02377 |
|                                | Central Africa         | southeastern Africa  | 0.28398 | 0.21522 |
|                                | Central Africa         | Mediterranean Region | 0.68361 | 0.40062 |
|                                | West Africa            | southeastern Africa  | 0.30718 | 0.19399 |
|                                | West Africa            | Mediterranean Region | 0.73768 | 0.36001 |
| Central Africa                 | southeastern Africa    | Mediterranean Region | 0.58889 | 0.50502 |
| <i>Nanonycteris veldkampii</i> | Central Africa         | West Africa          | 0.02967 | 0.00542 |
| <i>Epomops in West Africa</i>  | West Africa            | Central Africa       | 0.83816 | 0.65113 |
|                                | <i>E. buettikoferi</i> | <i>E. franqueti</i>  | 0       | 0.00807 |
| <i>Epomops franqueti</i>       | Central Africa         | West Africa          | 0.83714 | 0.28151 |
| <i>Epomophorus gambianus</i>   | Central Africa         | West Africa          | 0.36137 | 0.19214 |
| <i>Micropteropus pusillus</i>  | Central Africa         | West Africa          | 0.20841 | 0.00906 |
